# Supplementary material
Source: publisher figshare collection journal article supplement (https://acs.figshare.com/ndownloader/files/13589318)
Supplement: Supplementary file 2 [file 13589318]

Archive with 3 entries (3 files):
- info.xml
- ac8b03512_high_quality.mp4
- ac8b03512.pdf
