# Supplementary material
Source: publisher figshare collection journal article supplement (https://acs.figshare.com/ndownloader/files/13589318)
Supplement: Supplementary file 2 [file 13589318 › info.xml]

<presentation>
	<article>
		<title>Evaluation of the Capitainer-B Microfluidic Device as a New Hematocrit Independent Alternative for Dried Blood Spot Collection</title>
		<doi>10.1021/acs.analchem.8b03512</doi>
		<copyright>American Chemical Society</copyright>
		<narrator>Christophe Stove</narrator>
		<contact>Christophe Stove</contact>
		<contact-email>christophe.stove@ugent.be</contact-email>
		<author-list>
			<author>Christophe P. Stove</author>
		</author-list>
	</article>
	<slides height-width-ratio=".75">
		<slide audio-time="17">
			<subtitle/>
		</slide>
		<slide audio-time="82">
			<subtitle/>
		</slide>
		<slide audio-time="80">
			<subtitle/>
		</slide>
		<slide audio-time="60">
			<subtitle/>
		</slide>
		<slide audio-time="48">
			<subtitle/>
		</slide>
		<slide audio-time="99">
			<subtitle/>
		</slide>
		<slide audio-time="48">
			<subtitle/>
		</slide>
		<slide audio-time="46">
			<subtitle/>
		</slide>
	</slides>
	<audio duration="480"/>
</presentation>
